# Supplementary material
Source: PubMed Central journal article supplement (PMC4759498)
Supplement: NIHMS755373-supplement-Appendix_tables.pdf [file NIHMS755373-supplement-Appendix_tables.pdf]

eTable 1. Adjusted relative risks of single motherhood duration and partnership status while being a single mother on disability and SRH, ELSA and SHARE only

|                                                  | Any ADLs<br>limitations<br>(1) | Any<br>IADLs<br>limitations<br>(2) | Fair/Poor<br>SRH<br>(3) |
|--------------------------------------------------|--------------------------------|------------------------------------|-------------------------|
| single motherhood for 1-3<br>yrs                 | 0.98<br>[0.64,1.52]            | 1.03<br>[0.65,1.64]                | 1.24*<br>[1.02,1.51]    |
| single motherhood for 4-7<br>yrs                 | 0.81<br>[0.48,1.35]            | 1.04<br>[0.59,1.83]                | 1.22<br>[0.98,1.51]     |
| single motherhood for 8-13<br>yrs                | 1.94**<br>[1.18,3.17]          | 1.62<br>[0.88,2.98]                | 1.35**<br>[1.08,1.70]   |
| single motherhood for 14+<br>yrs                 | 1.72**<br>[1.19,2.48]          | 1.49<br>[0.94,2.37]                | 1.28*<br>[1.05,1.57]    |
| ever had partners while<br>being a single mother | 0.82<br>[0.55,1.20]            | 0.76<br>[0.48,1.20]                | 0.90<br>[0.75,1.09]     |

\*\*\* P<0.001, \*\* P<0.01, \* P<0.05

Notes: Each column of Column (1) to (3) presents relative risks (point estimates and 95% confidence intervals) of single motherhood by duration and by whether had a partner as a single mother, obtained from modified Poisson regressions with robust variance clustered at individual level. Data are weighted by sampling weights. Other control variables include the interactions of four country/region dummies with age, age squared, secondary education, primary education or less, number of children, and current marital status, as well as country and time fixed effects.

Single mothers, even if had partners, are associated with increased relative risks for ADLs and IADLs that  
Data sources: ELSA in year 2004 and 2006; SHARE in year 2004 and 2006 and SHARELIFE in year 2008.

eTable 2. Adjusted relative risks of age, education, and childhood conditions on having single motherhood experience, by region, using ELSA and SHARE

|                                            | Had single motherhood experience in |             |                |
|--------------------------------------------|-------------------------------------|-------------|----------------|
|                                            | England                             | Scandinavia | Western Europe |
| Age                                        | 0.89*                               | 0.86**      | 0.91           |
|                                            | [0.80,0.99]                         | [0.77,0.95] | [0.83,1.01]    |
| Age squared                                | 1.00                                | 1.00*       | 1.00           |
|                                            | [1.00,1.00]                         | [1.00,1.00] | [1.00,1.00]    |
| Secondary education                        | 1.26                                | 1.10        | 1.05           |
|                                            | [0.97,1.64]                         | [0.94,1.29] | [0.85,1.30]    |
| Primary education or less                  | 1.50**                              | 1.09        | 0.99           |
|                                            | [1.15,1.97]                         | [0.92,1.30] | [0.77,1.28]    |
| Poor health at age 10                      | 1.06                                | 1.01        | 0.95           |
|                                            | [0.92,1.22]                         | [0.87,1.17] | [0.80,1.12]    |
| Number of ppl per room at age 10           | 1.05                                | 1.09*       | 1.01           |
|                                            | [0.97,1.13]                         | [1.01,1.18] | [0.96,1.06]    |
| Number of books at home at age 10          | 0.98                                | 1.03        | 1.03           |
|                                            | [0.92,1.04]                         | [0.97,1.09] | [0.95,1.11]    |
| Living with both natural parents at age 10 | 0.76**                              | 0.80*       | 0.56***        |
|                                            | [0.64,0.91]                         | [0.64,0.99] | [0.42,0.75]    |

\*\*\* P<0.001, \*\* P<0.01, \* P<0.05

Notes:

Adjusted relative risks (point estimates and 95% confidence intervals) were obtained from modified Poisson regressions, with robust variance clustered at individual level. Country and time fixed effects were included.

Countries in each region are: Scandinavia (Denmark and Sweden) ,Western Europe (Austria, France, Germany, Switzerland, Belgium, Netherlands)

Data sources: Health and Retirement Study (HRS) in year 2004 and 2006; English Longitudinal Study of Aging (ELSA) in year 2004 and 2006; Survey of Health, Ageing, and Retirement in Europe (SHARE) in year 2004 and 2006 and SHARELIFE in year 2008.

eTable 3. Adjusted relative risks of single motherhood on disability and SRH, by region, using ELSA and SHARE

|                                            | Model specification I   |                          |                        |
|--------------------------------------------|-------------------------|--------------------------|------------------------|
|                                            | Any ADLs<br>limitations | Any IADLs<br>limitations | Fair/Poor<br>SRH       |
|                                            | (1)                     | (2)                      | (3)                    |
| England                                    |                         |                          |                        |
| Single motherhood                          | 1.55***<br>[1.31,1.83]  | 1.69***<br>[1.37,2.08]   | 1.62***<br>[1.44,1.83] |
| Poor health at age 10                      | 1.51***<br>[1.32,1.73]  | 1.66***<br>[1.39,1.99]   | 1.50***<br>[1.35,1.66] |
| Number of ppl per bedroom at age 10        | 0.99<br>[0.92,1.08]     | 1.01<br>[0.92,1.10]      | 1.04<br>[0.99,1.10]    |
| Number of books at home at age 10          | 0.96<br>[0.90,1.03]     | 0.91*<br>[0.84,1.00]     | 0.92**<br>[0.88,0.97]  |
| Living with both natural parents at age 10 | 1.07<br>[0.88,1.29]     | 1.06<br>[0.82,1.36]      | 1.03<br>[0.88,1.19]    |
| Scandinavia                                |                         |                          |                        |
| Single motherhood                          | 1.34<br>[0.96,1.87]     | 0.87<br>[0.53,1.41]      | 1.22*<br>[1.02,1.46]   |
| Poor health at age 10                      | 1.55**<br>[1.12,2.13]   | 1.14<br>[0.76,1.69]      | 1.52***<br>[1.29,1.80] |
| Number of ppl per bedroom at age 10        | 1.08<br>[0.93,1.25]     | 1.03<br>[0.85,1.26]      | 1.11*<br>[1.02,1.20]   |
| Number of books at home at age 10          | 1.09<br>[0.95,1.26]     | 0.96<br>[0.79,1.18]      | 0.95<br>[0.88,1.03]    |
| Living with both natural parents at age 10 | 0.71<br>[0.41,1.23]     | 1.07<br>[0.37,3.14]      | 0.90<br>[0.64,1.27]    |
| Western Europe                             |                         |                          |                        |
| Single motherhood                          | 1.13<br>[0.82,1.54]     | 0.98<br>[0.67,1.43]      | 1.25***<br>[1.10,1.41] |
| Poor health at age 10                      | 0.96<br>[0.85,1.07]     | 0.87*<br>[0.76,1.00]     | 1.13***<br>[1.05,1.22] |
| Number of ppl per bedroom at age 10        | 1.00<br>[1.00,1.00]     | 1.00**<br>[1.00,1.00]    | 1.00**<br>[1.00,1.00]  |
| Number of books at home at age 10          | 1.20<br>[0.80,1.79]     | 1.16<br>[0.67,2.03]      | 1.18<br>[0.98,1.43]    |
| Living with both natural parents at age 10 | 1.17<br>[0.77,1.76]     | 1.72*<br>[1.01,2.94]     | 1.48***<br>[1.22,1.80] |

\*\*\* P<0.001, \*\* P<0.01, \* P<0.05

Notes:

Adjusted relative risks (point estimates and 95% confidence intervals) were obtained from modified Poisson regressions, with robust variance clustered at individual level. Other control variables in "Model specification I" include the interactions of six country/region dummies with age, age squared, secondary education, primary education or less, and current marital status, as well as country and time fixed effects. Four variables on childhood conditions were included as control variables in "Model specification IV". Countries in each region are: Scandinavia (Denmark and Sweden) ,Western Europe (Austria, France, Germany, Switzerland, Belgium, Netherlands)

Data sources: Health and Retirement Study (HRS) in year 2004 and 2006; English Longitudinal Study of Aging (ELSA) in year 2004 and 2006; Survey of Health, Ageing, and Retirement in Europe (SHARE) in year 2004 and 2006 and SHARELIFE in year 2008.

eTable 4. Adjusted relative risks of single motherhood on health behaviors and selected chronic conditions, by region

|                                                                            | Ever-smoked            | Current smoker         | Obese               | Hypertension          | Diabetes/Heart disease/stroke |
|----------------------------------------------------------------------------|------------------------|------------------------|---------------------|-----------------------|-------------------------------|
| Single motherhood in                                                       |                        |                        |                     |                       |                               |
| US                                                                         | 1.29***<br>[1.22,1.36] | 1.36***<br>[1.19,1.55] | 1.04<br>[0.96,1.12] | 1.02<br>[0.97,1.07]   | 1.11**<br>[1.03,1.19]         |
| England                                                                    | 1.20***<br>[1.11,1.30] | 1.59***<br>[1.30,1.94] | 1.06<br>[0.91,1.23] | 1.19**<br>[1.07,1.32] | 1.47***<br>[1.28,1.69]        |
| Scandinavia                                                                | 1.26***<br>[1.13,1.40] | 1.47***<br>[1.19,1.82] | 1.24<br>[0.98,1.57] | 0.98<br>[0.83,1.14]   | 1.03<br>[0.82,1.30]           |
| Western Europe                                                             | 1.21*<br>[1.04,1.41]   | 1.42**<br>[1.09,1.85]  | 1.10<br>[0.89,1.37] | 1.03<br>[0.91,1.17]   | 1.16<br>[0.95,1.42]           |
| Southern Europe                                                            | 1.21<br>[0.85,1.72]    | 1.45<br>[0.95,2.21]    | 1.22<br>[0.91,1.64] | 0.93<br>[0.76,1.15]   | 0.93<br>[0.68,1.27]           |
| Eastern Europe                                                             | 1.46***<br>[1.22,1.75] | 1.40*<br>[1.06,1.84]   | 0.99<br>[0.74,1.31] | 1.02<br>[0.86,1.22]   | 1.01<br>[0.77,1.32]           |
| P-value of Wald test of equivalence of relative risks of single motherhood |                        |                        |                     |                       |                               |
| All six regions                                                            | 0.395                  | 0.883                  | 0.674               | 0.123                 | 0.006                         |

\*\*\* P<0.001, \*\* P<0.01, \* P<0.05

Notes:

"Obese" is defined as having body mass index (BMI) of 30 kg/m<sup>2</sup> and over. In HRS and SHARE, BMI was calculated based on self-reported weight and height. In ELSA, BMI was calculated based on weight and height measured during the nurse visit component of the survey and was only available in 2004.

Adjusted relative risks (point estimates and 95% confidence intervals) were obtained from modified Poisson regressions, with robust variance clustered at individual level, for each of the six regions. Data were weighted by sampling weights. Other control variables include age, age squared, secondary education, primary education or less, number of children, current marital status, as well as country and time fixed effects.

Countries in each region are: Scandinavia (Denmark and Sweden), Western Europe (Austria, France, Germany, Switzerland, Belgium, Netherlands), Southern Europe (Italy, Spain and Greece), and Eastern Europe (Poland and Czech Republic).

Data sources: Health and Retirement Study (HRS) in year 2004 and 2006; English Longitudinal Study of Aging (ELSA) in year 2004 and 2006; Survey of Health, Ageing, and Retirement in Europe (SHARE) in year 2004 and 2006 and SHARELIFE in year 2008.

eTable 5. Adjusted relative risks of single motherhood and health behaviors on disability and SRH, by region

|                      | Any ADLs<br>limitations | Any IADLs<br>limitations | Fair/Poor<br>SRH       |
|----------------------|-------------------------|--------------------------|------------------------|
| Single motherhood in |                         |                          |                        |
| US                   | 1.21***<br>[1.09,1.34]  | 1.22***<br>[1.10,1.37]   | 1.28***<br>[1.19,1.38] |
| England              | 1.43***<br>[1.18,1.74]  | 1.60***<br>[1.24,2.07]   | 1.58***<br>[1.36,1.84] |
| Scandinavia          | 1.42*<br>[1.01,1.98]    | 0.92<br>[0.57,1.48]      | 1.17<br>[0.97,1.40]    |
| Western Europe       | 1.11<br>[0.82,1.52]     | 1.01<br>[0.68,1.48]      | 1.21**<br>[1.07,1.36]  |
| Southern Europe      | 1.11<br>[0.79,1.55]     | 1.13<br>[0.75,1.71]      | 1.05<br>[0.90,1.21]    |
| Eastern Europe       | 0.89<br>[0.61,1.28]     | 0.81<br>[0.53,1.24]      | 1.00<br>[0.87,1.15]    |
| Ever-smoked in       |                         |                          |                        |
| US                   | 1.15**<br>[1.04,1.27]   | 1.16**<br>[1.04,1.29]    | 1.13***<br>[1.05,1.22] |
| England              | 1.21*<br>[1.01,1.44]    | 1.09<br>[0.85,1.41]      | 1.08<br>[0.93,1.26]    |
| Scandinavia          | 0.81<br>[0.56,1.15]     | 0.77<br>[0.50,1.19]      | 1.02<br>[0.84,1.24]    |
| Western Europe       | 1.31<br>[0.95,1.81]     | 1.05<br>[0.67,1.62]      | 0.97<br>[0.84,1.12]    |
| Southern Europe      | 0.77<br>[0.47,1.27]     | 0.94<br>[0.56,1.58]      | 0.96<br>[0.81,1.13]    |
| Eastern Europe       | 1.06<br>[0.75,1.52]     | 0.72<br>[0.41,1.28]      | 1.05<br>[0.92,1.20]    |

\*\*\* P<0.001, \*\* P<0.01, \* P<0.05

(Table continues on next page)

eTable 5. Adjusted relative risks of single motherhood and health behaviors on disability and SRH, by region (continued)

|                                                                            | Any ADLs<br>limitations | Any IADLs<br>limitations | Fair/Poor<br>SRH       |
|----------------------------------------------------------------------------|-------------------------|--------------------------|------------------------|
| Current smoker in                                                          |                         |                          |                        |
| US                                                                         | 1.27***<br>[1.10,1.46]  | 1.33***<br>[1.14,1.55]   | 1.28***<br>[1.16,1.40] |
| England                                                                    | 1.13<br>[0.89,1.45]     | 1.37<br>[1.00,1.90]      | 1.40***<br>[1.16,1.68] |
| Scandinavia                                                                | 1.76*<br>[1.13,2.75]    | 1.43<br>[0.81,2.53]      | 1.61***<br>[1.30,1.99] |
| Western Europe                                                             | 1.14<br>[0.74,1.75]     | 1.54<br>[0.87,2.75]      | 1.30**<br>[1.08,1.57]  |
| Southern Europe                                                            | 1.43<br>[0.74,2.75]     | 0.62<br>[0.23,1.66]      | 1.05<br>[0.84,1.31]    |
| Eastern Europe                                                             | 0.95                    | 1.70                     | 0.99                   |
| Currently obese in                                                         |                         |                          |                        |
| US                                                                         | 1.91***<br>[1.74,2.10]  | 1.60***<br>[1.45,1.78]   | 1.56***<br>[1.46,1.66] |
| England                                                                    | 2.04***<br>[1.73,2.39]  | 1.71***<br>[1.36,2.14]   | 1.60***<br>[1.40,1.83] |
| Scandinavia                                                                | 1.50*<br>[1.02,2.21]    | 1.24<br>[0.79,1.96]      | 1.68***<br>[1.40,2.01] |
| Western Europe                                                             | 2.02***<br>[1.56,2.61]  | 1.70***<br>[1.27,2.28]   | 1.67***<br>[1.51,1.85] |
| Southern Europe                                                            | 1.87***<br>[1.52,2.31]  | 1.62***<br>[1.24,2.11]   | 1.24***<br>[1.14,1.34] |
| Eastern Europe                                                             | 1.17<br>[0.91,1.51]     | 0.88<br>[0.63,1.23]      | 1.18**<br>[1.07,1.31]  |
| P-value of Wald test of equivalence of relative risks of single motherhood |                         |                          |                        |
| all six regions                                                            | 0.224                   | 0.066                    | 0.000                  |

\*\*\* P<0.001, \*\* P<0.01, \* P<0.05

Notes:

Adjusted relative risks (point estimates and 95% confidence intervals) were obtained from modified Poisson regressions, with robust variance clustered at individual level. Data were weighted by sampling weights. Other control variables include the interactions of six country/region dummies with age, age squared, secondary education, primary education or less, current marital status, as well as country and time fixed effects.



Countries in each region are: Scandinavia (Denmark and Sweden) ,Western Europe (Austria, France, Germany, Switzerland, Belgium, Netherlands), Southern Europe (Italy, Spain and Greece), and Eastern Europe (Poland and Czech Republic).

Data sources: Health and Retirement Study (HRS) in year 2004 and 2006; English Longitudinal Study of Aging (ELSA) in year 2004 and 2006; Survey of Health, Ageing, and Retirement in Europe (SHARE) in year 2004 and 2006 and SHARELIFE in year 2008.

eTable 6. Adjusted relative risks of single motherhood and cardio-vascular related conditions on disability and SRH, by region

|                                                   | Any ADLs<br>limitations | Any IADLs<br>limitations | Fair/Poor<br>SRH       |
|---------------------------------------------------|-------------------------|--------------------------|------------------------|
| Single motherhood in                              |                         |                          |                        |
| US                                                | 1.22***<br>[1.10,1.35]  | 1.22***<br>[1.09,1.36]   | 1.28***<br>[1.19,1.37] |
| England                                           | 1.39***<br>[1.19,1.61]  | 1.51***<br>[1.24,1.83]   | 1.47***<br>[1.31,1.65] |
| Scandinavia                                       | 1.50**<br>[1.11,2.03]   | 0.98<br>[0.65,1.50]      | 1.24*<br>[1.04,1.47]   |
| Western Europe                                    | 1.08<br>[0.79,1.46]     | 0.98<br>[0.68,1.42]      | 1.20**<br>[1.06,1.35]  |
| Southern Europe                                   | 1.20<br>[0.83,1.73]     | 1.14<br>[0.78,1.67]      | 1.09<br>[0.95,1.25]    |
| Eastern Europe                                    | 0.93<br>[0.66,1.30]     | 0.84<br>[0.56,1.25]      | 1.01<br>[0.89,1.14]    |
| Ever diagnosed with heart disease/diabetes/stroke |                         |                          |                        |
| US                                                | 1.98***<br>[1.80,2.19]  | 2.12***<br>[1.91,2.35]   | 2.06***<br>[1.92,2.21] |
| England                                           | 1.83***<br>[1.59,2.10]  | 2.15***<br>[1.79,2.59]   | 1.83***<br>[1.66,2.03] |
| Scandinavia                                       | 2.21***<br>[1.65,2.95]  | 2.32***<br>[1.68,3.21]   | 1.78***<br>[1.49,2.12] |
| Western Europe                                    | 1.66***<br>[1.27,2.18]  | 1.70***<br>[1.27,2.29]   | 1.69***<br>[1.53,1.88] |
| Southern Europe                                   | 1.76***<br>[1.40,2.21]  | 1.89***<br>[1.49,2.40]   | 1.42***<br>[1.32,1.53] |
| Eastern Europe                                    | 1.62***<br>[1.27,2.07]  | 1.51**<br>[1.15,1.99]    | 1.45***<br>[1.33,1.57] |
| Ever diagnosed with hypertension                  |                         |                          |                        |
| US                                                | 1.41***<br>[1.27,1.57]  | 1.37***<br>[1.23,1.54]   | 1.36***<br>[1.26,1.47] |
| England                                           | 1.26***<br>[1.10,1.45]  | 1.19<br>[1.00,1.42]      | 1.40***<br>[1.27,1.55] |
| Scandinavia                                       | 0.96<br>[0.72,1.28]     | 1.21<br>[0.85,1.71]      | 1.28**<br>[1.09,1.51]  |
| Western Europe                                    | 1.28*<br>[1.01,1.62]    | 0.98<br>[0.75,1.27]      | 1.42***<br>[1.28,1.57] |
| Southern Europe                                   | 1.23<br>[0.98,1.54]     | 1.18<br>[0.89,1.55]      | 1.16***<br>[1.08,1.26] |
| Eastern Europe                                    | 1.25                    | 1.00                     | 1.23***                |

[0.98,1.60]      [0.76,1.31]      [1.12,1.35]

P-value of Wald test of equivalence of relative risks of single motherhood

|                 |       |       |       |
|-----------------|-------|-------|-------|
| all six regions | 0.201 | 0.065 | 0.000 |
|-----------------|-------|-------|-------|

---

\*\*\* P<0.001, \*\* P<0.01, \* P<0.05

Notes:

Outcomes on chronic conditions are based on questions of "Have a doctor ever told you that you had ....".

Adjusted relative risks (point estimates and 95% confidence intervals) were obtained from Poisson regressions with robust variance clustered at individual level. Other control variables include the interactions of six country/region dummies with age, age squared, secondary education, primary education or less, number of children, and current marital status, as well as country and time fixed effects. Countries in each regions are: Scandinavia (Denmark and Sweden) ,Western Europe (Austria, France, Germany, Switzerland, Belgium, Netherlands), Southern Europe (Italy, Spain and Greece), and Eastern Europe (Poland and Czech Republic).

Data sources: Health and Retirement Study (HRS) in year 2004 and 2006; English Longitudinal Study of Aging (ELSA) in year 2004 and 2006; Survey of Health, Ageing, and Retirement in Europe (SHARE) in year 2004 and 2006 and SHARELIFE in year 2008.

eTable 7. Adjusted relative risks of single motherhood on disability and SRH, for aged 65 and over only, by region

|                                                                            | Model specification I                      |                                             |                                     | Model specification II                     |                                             |                                     |
|----------------------------------------------------------------------------|--------------------------------------------|---------------------------------------------|-------------------------------------|--------------------------------------------|---------------------------------------------|-------------------------------------|
|                                                                            | Any ADLs limitations<br>RR (95% CI)<br>(1) | Any IADLs limitations<br>RR (95% CI)<br>(2) | Fair/Poor SRH<br>RR (95% CI)<br>(3) | Any ADLs limitations<br>RR (95% CI)<br>(4) | Any IADLs limitations<br>RR (95% CI)<br>(5) | Fair/Poor SRH<br>RR (95% CI)<br>(6) |
| Single motherhood in                                                       |                                            |                                             |                                     |                                            |                                             |                                     |
| US                                                                         | 1.27***<br>[1.13,1.41]                     | 1.30***<br>[1.16,1.46]                      | 1.36***<br>[1.25,1.47]              | 1.11<br>[0.99,1.24]                        | 1.13*<br>[1.01,1.26]                        | 1.21***<br>[1.12,1.31]              |
| England                                                                    | 1.40***<br>[1.15,1.72]                     | 1.72***<br>[1.33,2.23]                      | 1.60***<br>[1.36,1.88]              | 1.31*<br>[1.06,1.61]                       | 1.42*<br>[1.08,1.86]                        | 1.45***<br>[1.23,1.71]              |
| Scandinavia                                                                | 1.35<br>[0.89,2.05]                        | 1.08<br>[0.65,1.77]                         | 0.99<br>[0.76,1.29]                 | 1.24<br>[0.82,1.87]                        | 0.92<br>[0.57,1.48]                         | 0.91<br>[0.70,1.18]                 |
| Western Europe                                                             | 0.77<br>[0.52,1.16]                        | 0.72<br>[0.45,1.14]                         | 1.18*<br>[1.00,1.38]                | 0.72<br>[0.48,1.09]                        | 0.66<br>[0.42,1.06]                         | 1.12<br>[0.96,1.32]                 |
| Southern Europe                                                            | 0.93<br>[0.63,1.38]                        | 0.97<br>[0.65,1.46]                         | 0.99<br>[0.84,1.16]                 | 0.80<br>[0.54,1.17]                        | 0.88<br>[0.60,1.29]                         | 0.97<br>[0.83,1.14]                 |
| Eastern Europe                                                             | 0.92<br>[0.59,1.41]                        | 0.88<br>[0.56,1.38]                         | 1.00<br>[0.85,1.17]                 | 0.88<br>[0.57,1.35]                        | 0.85<br>[0.56,1.31]                         | 1.02<br>[0.88,1.19]                 |
| P-value of Wald test of equivalence of relative risks of single motherhood |                                            |                                             |                                     |                                            |                                             |                                     |
| All six regions                                                            | 0.059                                      | 0.007                                       | 0.000                               | 0.057                                      | 0.048                                       | 0.002                               |
| England vs US                                                              | 0.378                                      | 0.050                                       | 0.075                               | 0.161                                      | 0.126                                       | 0.048                               |
| England vs Scandinavia                                                     | 0.862                                      | 0.100                                       | 0.002                               | 0.800                                      | 0.122                                       | 0.003                               |
| England vs Western Europe                                                  | 0.011                                      | 0.001                                       | 0.009                               | 0.012                                      | 0.006                                       | 0.027                               |
| England vs Southern Europe                                                 | 0.070                                      | 0.020                                       | 0.000                               | 0.025                                      | 0.048                                       | 0.001                               |
| England vs Eastern Europe                                                  | 0.080                                      | 0.011                                       | 0.000                               | 0.101                                      | 0.050                                       | 0.002                               |

\*\*\* P<0.001, \*\* P<0.01, \* P<0.05

Adjusted relative risks (point estimates and 95% confidence intervals) of single motherhood by region, obtained from modified Poisson regressions, with robust variance clustered at individual level. Data are weighted by sampling weights. Other control variables in "Model specification I" include the interactions of six country/region dummies with age, age squared, secondary education, primary education or less, and current marital status, as well as country and time fixed effects. Extra control variables are in "Model

specification II": interactions of regional dummies with per-capita household income quintiles and per-capita household wealth quintiles.

Countries in each regions are: Scandinavia (Denmark and Sweden) ,Western Europe (Austria, France, Germany, Switzerland, Belgium, Netherlands), Southern Europe (Italy, Spain and Greece), and Eastern Europe (Poland and Czech Republic).

Data sources: HRS in year 2004 and 2006; ELSA in year 2004 and 2006; SHARE in year 2004 and 2006 and SHARELIFE in year 2008, aged 65 and over only.

eTable 8. Adjusted relative risks of single motherhood on disability and SRH, by race/ethnicity in US

|                                                                                      | Any ADLs<br>limitations   | Any IADLs<br>limitations | Fair/Poor<br>SRH          |
|--------------------------------------------------------------------------------------|---------------------------|--------------------------|---------------------------|
| Single motherhood among                                                              |                           |                          |                           |
| Non-Hispanic black                                                                   | 1.17<br>(0.95 to 1.44)    | 1.26*<br>(1.02 to 1.55)  | 1.21**<br>(1.05 to 1.40)  |
| Hispanic                                                                             | 1.24<br>(0.96 to 1.60)    | 1.19<br>(0.89 to 1.58)   | 0.96<br>(0.84 to 1.09)    |
| Non-Hispanic white                                                                   | 1.20**<br>(1.06 to 1.37)  | 1.22**<br>(1.07 to 1.40) | 1.35***<br>(1.23 to 1.49) |
| Non-Hispanic black                                                                   | 1.42***<br>(1.19 to 1.70) | 1.29**<br>(1.08 to 1.54) | 1.41***<br>(1.24 to 1.60) |
| Hispanic                                                                             | 1.22*<br>(1.01 to 1.47)   | 1.04<br>(0.85 to 1.27)   | 1.80***<br>(1.62 to 2.00) |
| P-value of Wald test of equivalence of RRs of<br>single motherhood by race/ethnicity | 0.942                     | 0.947                    | 0.000                     |

\*\*\* P<0.001, \*\* P<0.01, \* P<0.05

Notes:

Adjusted Relative risks (point estimates and 95% confidence intervals) were obtained from modified Poisson regressions with robust variance clustered at individual level. Data were weighted by sampling weights. Other control variables include age, age squared, secondary education, primary education or less, current marital status, and time fixed effects.

Data sources: Health and retirement study wave 7 and 8.

eTable 9. Adjusted relative risks of single motherhood duration and maximum number of children while being a single mother on disability and SRH, all regions combined

|                                         | Any ADLs<br>limitations | Any IADLs<br>limitations | Fair/Poor<br>SRH       |
|-----------------------------------------|-------------------------|--------------------------|------------------------|
| single motherhood for 1-3 years         | 0.97<br>[0.83,1.14]     | 0.90<br>[0.74,1.08]      | 1.14**<br>[1.04,1.26]  |
| single motherhood for 4-7 years         | 0.94<br>[0.77,1.14]     | 1.13<br>[0.93,1.37]      | 1.23***<br>[1.11,1.37] |
| single motherhood for 8-13 years        | 1.32**<br>[1.08,1.60]   | 1.13<br>[0.91,1.39]      | 1.26***<br>[1.13,1.41] |
| single motherhood for 14+ years         | 1.55***<br>[1.28,1.86]  | 1.31*<br>[1.06,1.61]     | 1.41***<br>[1.26,1.58] |
| 2+ children while being a single mother | 1.14<br>[0.98,1.33]     | 1.23*<br>[1.05,1.46]     | 1.02<br>[0.93,1.12]    |

\*\*\* P<0.001, \*\* P<0.01, \* P<0.05

Notes: Adjusted relative risks (point estimates and 95% confidence intervals) were obtained from modified Poisson regressions with robust variance clustered at individual level. We also control for age, age squared, education, number of children, current marital status, time of interview, and country-fixed effects.

Data sources: HRS in 2004 and 2006, ELSA in year 2004 and 2006; SHARE in year 2004 and 2006 and SHARELIFE in year 2008.

eTable 10. Adjusted relative risks of single motherhood duration and fertility history on disability and SRH, using SHARE and ELSA.

|                                   | Any<br>ADLs<br>limitations | Any<br>IADLs<br>limitations | Fair/Poor<br>SRH          | Any<br>ADLs<br>limitations | Any<br>IADLs<br>limitations | Fair/Poor<br>SRH           |
|-----------------------------------|----------------------------|-----------------------------|---------------------------|----------------------------|-----------------------------|----------------------------|
| single motherhood for 1-3 yrs     | 0.83<br>[0.60,1.15<br>]    | 0.82<br>[0.55,1.21<br>]     | 1.14<br>[0.99,1.31<br>]   | 0.80<br>[0.58,1.10<br>]    | 0.79<br>[0.53,1.16<br>]     | 1.11<br>[0.96,1.27<br>]    |
| single motherhood for 4-7 yrs     | 0.67*<br>[0.45,0.99<br>]   | 0.80<br>[0.54,1.18<br>]     | 1.11<br>[0.97,1.26<br>]   | 0.62*<br>[0.43,0.92<br>]   | 0.73<br>[0.50,1.07<br>]     | 1.07<br>[0.94,1.22<br>]    |
| single motherhood for 8-13<br>yrs | 1.61*<br>[1.11,2.33<br>]   | 1.26<br>[0.81,1.94<br>]     | 1.23**<br>[1.06,1.42<br>] | 1.52*<br>[1.05,2.21<br>]   | 1.18<br>[0.76,1.82<br>]     | 1.19*<br>[1.03,1.38<br>]   |
| single motherhood for 14+<br>yrs  | 1.46*<br>[1.08,1.96<br>]   | 1.19<br>[0.80,1.79<br>]     | 1.18*<br>[1.01,1.37<br>]  | 1.44*<br>[1.07,1.93<br>]   | 1.18<br>[0.79,1.75<br>]     | 1.16<br>[0.99,1.34<br>]    |
| First pregnancy before age 20     |                            |                             |                           | 1.56***<br>[1.25,1.95<br>] | 1.69***<br>[1.34,2.14<br>]  | 1.29***<br>[1.17,1.41<br>] |
| First pregnancy after age 30      |                            |                             |                           | 0.95<br>[0.76,1.20<br>]    | 1.00<br>[0.78,1.28<br>]     | 0.94<br>[0.86,1.03<br>]    |
| Number of children                |                            |                             |                           | 1.03<br>[0.99,1.08<br>]    | 1.05*<br>[1.00,1.09<br>]    | 1.00<br>[0.98,1.02<br>]    |
| Any still born children           |                            |                             |                           | 1.07<br>[0.83,1.38<br>]    | 0.89<br>[0.68,1.17<br>]     | 1.09*<br>[1.00,1.19<br>]   |

\*\*\* P<0.001, \*\* P<0.01, \* P<0.05

Adjusted relative risks (point estimates and 95% confidence intervals) were obtained from modified Poisson regressions, with robust variance clustered at individual level. Other control variables include age, age squared, secondary education, primary education or less, and current marital status, as well as country (if multiple countries) and time fixed effects.

Data sources: English Longitudinal Study of Aging (ELSA) wave 2 and 3, SHARE wave 1 and 2 and SHARELIFE.



eTable 11. Adjusted Relative risks of single motherhood on disability and SRH among women aged 50+, by region, outcomes in year 2004 only

|                                                                            | Model specification I                      |                                             |                                     | Model specification II                     |                                             |                                     |
|----------------------------------------------------------------------------|--------------------------------------------|---------------------------------------------|-------------------------------------|--------------------------------------------|---------------------------------------------|-------------------------------------|
|                                                                            | Any ADLs limitations<br>RR (95% CI)<br>(1) | Any IADLs limitations<br>RR (95% CI)<br>(2) | Fair/Poor SRH<br>RR (95% CI)<br>(3) | Any ADLs limitations<br>RR (95% CI)<br>(4) | Any IADLs limitations<br>RR (95% CI)<br>(5) | Fair/Poor SRH<br>RR (95% CI)<br>(6) |
| single motherhood in                                                       |                                            |                                             |                                     |                                            |                                             |                                     |
| US                                                                         | 1.36***<br>[1.20,1.54]                     | 1.31***<br>[1.15,1.49]                      | 1.34***<br>[1.23,1.45]              | 1.17*<br>[1.04,1.32]                       | 1.13<br>[0.99,1.29]                         | 1.18***<br>[1.09,1.28]              |
| England                                                                    | 1.51***<br>[1.27,1.80]                     | 1.75***<br>[1.41,2.17]                      | 1.70***<br>[1.49,1.95]              | 1.43***<br>[1.20,1.71]                     | 1.48***<br>[1.19,1.84]                      | 1.52***<br>[1.32,1.74]              |
| Scandinavia                                                                | 1.35<br>[0.88,2.06]                        | 1.36<br>[0.81,2.26]                         | 1.35*<br>[1.00,1.82]                | 1.27<br>[0.83,1.94]                        | 1.26<br>[0.75,2.11]                         | 1.24<br>[0.92,1.68]                 |
| Western Europe                                                             | 1.00<br>[0.67,1.48]                        | 1.01<br>[0.66,1.57]                         | 1.23**<br>[1.05,1.44]               | 0.91<br>[0.61,1.36]                        | 0.94<br>[0.61,1.44]                         | 1.17<br>[1.00,1.38]                 |
| Southern Europe                                                            | 1.04<br>[0.65,1.65]                        | 0.86<br>[0.49,1.51]                         | 1.03<br>[0.85,1.26]                 | 0.90<br>[0.56,1.46]                        | 0.80<br>[0.46,1.39]                         | 1.02<br>[0.84,1.25]                 |
| Eastern Europe                                                             | NA                                         | NA                                          | NA                                  | NA                                         | NA                                          | NA                                  |
| P-value of Wald test of equivalence of relative risks of single motherhood |                                            |                                             |                                     |                                            |                                             |                                     |
| All six regions                                                            | 0.000                                      | 0.000                                       | 0.000                               | 0.000                                      | 0.004                                       | 0.000                               |
| England vs US                                                              | 0.320                                      | 0.024                                       | 0.003                               | 0.068                                      | 0.038                                       | 0.002                               |
| England vs Scandinavia                                                     | 0.625                                      | 0.372                                       | 0.165                               | 0.611                                      | 0.585                                       | 0.241                               |
| England vs Western Europe                                                  | 0.058                                      | 0.028                                       | 0.002                               | 0.046                                      | 0.065                                       | 0.017                               |
| England vs Southern Europe                                                 | 0.134                                      | 0.021                                       | 0.000                               | 0.077                                      | 0.042                                       | 0.001                               |
| England vs Eastern Europe                                                  | NA                                         | NA                                          | NA                                  | NA                                         | NA                                          | NA                                  |

\*\*\* P<0.001, \*\* P<0.01, \* P<0.05

Notes: Each column of Column (1) to (6) presents relative risks (point estimates and 95% confidence intervals) of single motherhood by region, obtained from modified Poisson regressions with robust variance clustered at individual level. Data are weighted by sampling weights. Other control variables in "Model specification I" include the interactions of six country/region dummies with age, age squared, secondary education, primary education or less, number of children, and current marital status, as well as country and time fixed effects. Extra control variables are in "Model specification II": interactions of regional dummies with per-capita household income quintiles and per-capita household wealth quintiles. Countries in each regions are: Scandinavia (Denmark and Sweden) ,Western Europe (Austria, France, Germany, Switzerland, Belgium, Netherlands), and Southern Europe (Italy, Spain and Greece). Eastern European countries (Poland and Czech Republic) were not included in SHARE in year 2004.

Data sources: HRS in year 2004; ELSA in year 2004 and life survey in 2006; SHARE in year 2004 and SHARELIFE in year 2008.

eTable 12. Adjusted Relative risks of single motherhood on disability and SRH among women aged 50+, by region, outcomes in year 2006 only

|                                                                            | Model specification I                      |                                             |                                     | Model specification II                     |                                             |                                     |
|----------------------------------------------------------------------------|--------------------------------------------|---------------------------------------------|-------------------------------------|--------------------------------------------|---------------------------------------------|-------------------------------------|
|                                                                            | Any ADLs limitations<br>RR (95% CI)<br>(1) | Any IADLs limitations<br>RR (95% CI)<br>(2) | Fair/Poor SRH<br>RR (95% CI)<br>(3) | Any ADLs limitations<br>RR (95% CI)<br>(4) | Any IADLs limitations<br>RR (95% CI)<br>(5) | Fair/Poor SRH<br>RR (95% CI)<br>(6) |
| single motherhood in                                                       |                                            |                                             |                                     |                                            |                                             |                                     |
| US                                                                         | 1.21**<br>[1.07,1.36]                      | 1.27***<br>[1.12,1.43]                      | 1.32***<br>[1.21,1.43]              | 1.04<br>[0.93,1.17]                        | 1.09<br>[0.96,1.23]                         | 1.16***<br>[1.07,1.26]              |
| England                                                                    | 1.43**<br>[1.13,1.81]                      | 1.48**<br>[1.11,1.97]                       | 1.49***<br>[1.27,1.75]              | 1.31*<br>[1.03,1.66]                       | 1.25<br>[0.95,1.66]                         | 1.38***<br>[1.18,1.61]              |
| Scandinavia                                                                | 1.58**<br>[1.14,2.18]                      | 0.76<br>[0.47,1.21]                         | 1.10<br>[0.91,1.33]                 | 1.51*<br>[1.08,2.10]                       | 0.66<br>[0.41,1.04]                         | 1.04<br>[0.87,1.26]                 |
| Western Europe                                                             | 1.11<br>[0.78,1.58]                        | 0.93<br>[0.59,1.48]                         | 1.25**<br>[1.09,1.44]               | 1.02<br>[0.72,1.45]                        | 0.86<br>[0.54,1.37]                         | 1.19*<br>[1.04,1.37]                |
| Southern Europe                                                            | 1.17<br>[0.75,1.84]                        | 1.18<br>[0.73,1.88]                         | 1.08<br>[0.92,1.27]                 | 0.95<br>[0.62,1.47]                        | 0.99<br>[0.62,1.56]                         | 1.05<br>[0.90,1.23]                 |
| Eastern Europe                                                             | 0.87<br>[0.61,1.23]                        | 0.81<br>[0.53,1.25]                         | 1.00<br>[0.87,1.14]                 | 0.85<br>[0.59,1.20]                        | 0.82<br>[0.54,1.23]                         | 1.00<br>[0.87,1.13]                 |
| P-value of Wald test of equivalence of relative risks of single motherhood |                                            |                                             |                                     |                                            |                                             |                                     |
| All six regions                                                            | 0.154                                      | 0.054                                       | 0.001                               | 0.109                                      | 0.154                                       | 0.031                               |
| England vs US                                                              | 0.210                                      | 0.335                                       | 0.181                               | 0.092                                      | 0.363                                       | 0.059                               |
| England vs Scandinavia                                                     | 0.629                                      | 0.017                                       | 0.016                               | 0.497                                      | 0.019                                       | 0.024                               |
| England vs Western Europe                                                  | 0.248                                      | 0.096                                       | 0.108                               | 0.255                                      | 0.174                                       | 0.174                               |
| England vs Southern Europe                                                 | 0.448                                      | 0.417                                       | 0.005                               | 0.211                                      | 0.379                                       | 0.017                               |
| England vs Eastern Europe                                                  | 0.021                                      | 0.023                                       | 0.000                               | 0.045                                      | 0.093                                       | 0.002                               |

\*\*\* P<0.001, \*\* P<0.01, \* P<0.05

Notes: Each column of Column (1) to (6) presents relative risks (point estimates and 95% confidence intervals) of single motherhood by region, obtained from modified Poisson regressions with robust variance clustered at individual level. Data are weighted by sampling weights. Other control variables in "Model specification I" include the interactions of six country/region dummies with age, age squared, secondary education, primary education or less, number of children, and current marital status, as well as country and time fixed effects. Extra control variables are in "Model specification II": interactions of regional dummies with per-capita household income quintiles and per-capita household wealth quintiles. Countries in each regions are: Scandinavia (Denmark and Sweden) ,Western Europe (Austria, France, Germany, Switzerland, Belgium, Netherlands), Southern Europe (Italy, Spain and Greece), and Eastern Europe (Poland and Czech Republic). Data sources: HRS in year 2006; ELSA in year 2006; SHARE in year 2006 and SHARELIFE in year 2008.
